# Supplementary material for: Highly efficient and durable aqueous electrocatalytic reduction of CO2 to HCOOH with a novel bismuth–MOF: experimental and DFT studies
Source: Royal Society of Chemistry journal article supplement (doi:10.1039/d0ta00384k), 2020-01-01
Supplement: d0ta00384k1.pdf [file d0ta00384k1.pdf]

## Supporting Information

### **Highly efficient and durable aqueous electrocatalytic reduction of CO<sub>2</sub> to HCOOH with a novel Bismuth-MOF: experimental and DFT study**

Xurui Zhang<sup>1</sup>, Yanxing Zhang<sup>2,3</sup>, Qingqing Li<sup>1</sup>, Xiaodong Zhou<sup>3</sup>, Qingyu Li<sup>4</sup>, Jin Yi<sup>1</sup>, Yuyu

Liu<sup>1,\*</sup>, Jiujun Zhang<sup>1</sup>

<sup>1</sup> Institute of Sustainable Energy/College of Sciences, Shanghai University, Shanghai 200444, China.

<sup>2</sup> School of Physics, Henan Normal University, Xinxiang, Henan 453007, China

<sup>3</sup> Department of Chemical Engineering, University of Louisiana at Lafayette, Lafayette, Louisiana 70504, United States.

<sup>4</sup> Guangxi Key Laboratory of Low Carbon Energy Materials, School of Chemical and Pharmaceutical Science, Guangxi Normal University, Guilin, Guangxi 541004, China.

\*Corresponding author: E-mail: liuyuyu@shu.edu.cn.

**Table S1.** MOF-based materials for CO<sub>2</sub> electrocatalytic reduction.

| Metal–organic framework -based materials                                              | Electrolyte                               | Electric potential                    | FE (main products)                                                                 | Refs |
|---------------------------------------------------------------------------------------|-------------------------------------------|---------------------------------------|------------------------------------------------------------------------------------|------|
| HKUST-1 MOF (= [Cu <sub>3</sub> (BTC) <sub>2</sub> ·3H <sub>2</sub> O] <sub>n</sub> ) | 0.5M KHCO <sub>3</sub>                    | -0.9 V <sub>Ag/Ag</sub> <sup>+</sup>  | 5.6% (CH <sub>3</sub> OH), 10.3% (C <sub>2</sub> H <sub>5</sub> OH), 15.9% (Total) | 1    |
| HKUST-1 MOF                                                                           | 1M KOH                                    | -1.07 V <sub>RHE</sub>                | 45% (C <sub>2</sub> H <sub>4</sub> )                                               | 2    |
| HKUST-1 MOF                                                                           | 0.5M KHCO <sub>3</sub>                    | -2.0 V <sub>SCE</sub>                 | 20% (CH <sub>4</sub> )                                                             | 3    |
|                                                                                       | 0.5M KHCO <sub>3</sub>                    | -1.8 V <sub>SCE</sub>                 | 16% (C <sub>2</sub> H <sub>4</sub> )                                               |      |
| HKUST-1 MOF                                                                           | 0.01M TBATFB in DMF                       | -2.5 V <sub>Ag/Ag</sub> <sup>+</sup>  | 51% (H <sub>2</sub> C <sub>2</sub> O <sub>4</sub> )                                | 4    |
| Copper porphyrin MOF nanosheets                                                       | 1M H <sub>2</sub> O and 0.5M              | -1.55 V <sub>Ag/Ag</sub> <sup>+</sup> | 68.4% (HCOOH)                                                                      | 5    |
| Cu <sub>2</sub> (CuTCPP) MOF nanosheets                                               | EMIMBF <sub>4</sub> in CH <sub>3</sub> CN | 1.65 V <sub>Ag/Ag</sub> <sup>+</sup>  | 85.2% (Total)                                                                      |      |
| TCPP = 5,10,15,20-tetrakis(4-carboxyphenyl) porphyrin                                 |                                           |                                       |                                                                                    |      |
| Copper(II)-5,10,15,20-tetrakis(4-carboxyphenyl) porphyrin–Cu(II)                      |                                           |                                       |                                                                                    |      |
| CuBi12 (= MOF prepared from blends of 79% HKUST-1 and 21% CAU-17)                     | 0.5M KHCO <sub>3</sub>                    | -0.21 V <sub>RHE</sub>                | 8.6% (CH <sub>3</sub> OH), 28.3% (CH <sub>3</sub> CH <sub>2</sub> OH)              | 6    |
| Copper rubeanate MOF                                                                  | 0.5M KHCO <sub>3</sub>                    | -1.2 V <sub>SHE</sub>                 | 98% (HCOOH)                                                                        | 7    |

|                                                                                                                                                                                                                   |                                                                      |                                     |                                      |           |
|-------------------------------------------------------------------------------------------------------------------------------------------------------------------------------------------------------------------|----------------------------------------------------------------------|-------------------------------------|--------------------------------------|-----------|
| Oxide-derived Cu/carbon, OD Cu/C-1000                                                                                                                                                                             | 0.1M KHCO <sub>3</sub>                                               | -0.3 V <sub>RHE</sub>               | 43.2% (CH <sub>3</sub> OH)           | 8         |
| Cu <sup>II</sup> /adeninato/carboxylato metal–biomolecule frameworks<br>(Cu <sup>II</sup> /ade–MOFs)                                                                                                              | 0.1M NaHCO <sub>3</sub>                                              |                                     | 73% (Total)                          | 9         |
|                                                                                                                                                                                                                   |                                                                      | -1.4 V <sub>RHE</sub>               | 45% (C <sub>2</sub> H <sub>4</sub> ) |           |
|                                                                                                                                                                                                                   |                                                                      | -1.6 V <sub>RHE</sub>               | 50% (CH <sub>4</sub> )               |           |
| Defective polymeric Co phthalocyanine                                                                                                                                                                             | 0.5M KHCO <sub>3</sub>                                               | -0.61 V <sub>RHE</sub>              | 97 % (CO)                            | 10        |
| ZIF-8 (= Zeolitic imidazolate framework)                                                                                                                                                                          | 0.5M NaCl                                                            | -1.8 V <sub>SCE</sub>               | 69.8% (CO)                           | 11        |
| ZIF-8                                                                                                                                                                                                             | 0.25M K <sub>2</sub> SO <sub>4</sub>                                 | -1.1 V <sub>RHE</sub>               | 81.0% (CO)                           | 12        |
| Zn–BTC MOFs                                                                                                                                                                                                       | BmimPF <sub>6</sub>                                                  | -2.2 V <sub>Ag/Ag<sup>+</sup></sub> | 92.8% (CH <sub>4</sub> )             | 13        |
| Fe <sub>2</sub> -MOF-525 (= Fe–porphyrin–based MOF–525 Films)<br>[Zr <sub>6</sub> O <sub>4</sub> (OH) <sub>4</sub> (TCPP) <sub>3</sub> ] (MOF-525, H <sub>4</sub> TCPP = meso-tetrakis(4-carboxyphenyl)porphyrin) | 1M TBAPF <sub>6</sub> /acetonitrile                                  | -1.3 V <sub>NHE</sub>               | 54±2 % (CO)                          | 14        |
| Re-SURMOF (= ReL(CO) <sub>3</sub> Cl into highly oriented surface-grafted MOF thin films<br>L = 2,2'-bipyridine-5,5'-dicarboxylic acid                                                                            | 0.1M TBAH in CH <sub>3</sub> CN with 5% trifluoroethanol (by volume) | -1.6 V <sub>NHE</sub>               | 93±5% (CO)                           | 15        |
| PCN-222(Fe)                                                                                                                                                                                                       | 0.5M KHCO <sub>3</sub>                                               | -0.60 V <sub>RHE</sub>              | 91% (CO)                             | 16        |
| Bi-BTC-D<br>C <sub>12</sub> H <sub>10</sub> BiNO <sub>7</sub>                                                                                                                                                     | 0.5M KHCO <sub>3</sub>                                               | -0.86 V <sub>RHE</sub>              | 95.5% (HCOOH)                        | This work |

**Table S2.** Crystal data and structure refinement for 20190920zh\_znz4046\_2\_0m\_a\_sq.

|                                   |                                                     |                    |
|-----------------------------------|-----------------------------------------------------|--------------------|
| Identification code               | 20190920zh_znz4046_2_0m_a_sq                        |                    |
| Empirical formula                 | C <sub>12</sub> H <sub>10</sub> Bi N O <sub>7</sub> |                    |
| Formula weight                    | 489.19                                              |                    |
| Temperature                       | 173(2) K                                            |                    |
| Wavelength                        | 1.34139 Å                                           |                    |
| Crystal system                    | Monoclinic                                          |                    |
| Space group                       | P2 <sub>1</sub> /n                                  |                    |
| Unit cell dimensions              | a = 10.1416(3) Å                                    | α = 90°.           |
|                                   | b = 14.7630(4) Å                                    | β = 100.1670(10)°. |
|                                   | c = 11.3618(3) Å                                    | γ = 90°.           |
| Volume                            | 1674.38(8) Å <sup>3</sup>                           |                    |
| Z                                 | 4                                                   |                    |
| Density (calculated)              | 1.941 Mg/m <sup>3</sup>                             |                    |
| Absorption coefficient            | 13.954 mm <sup>-1</sup>                             |                    |
| F(000)                            | 912                                                 |                    |
| Crystal size                      | 0.130 x 0.110 x 0.080 mm <sup>3</sup>               |                    |
| Theta range for data collection   | 4.691 to 52.994°.                                   |                    |
| Index ranges                      | -12 ≤ h ≤ 12, -17 ≤ k ≤ 16, -13 ≤ l ≤ 13            |                    |
| Reflections collected             | 13110                                               |                    |
| Independent reflections           | 2943 [R(int) = 0.0470]                              |                    |
| Completeness to theta = 52.994°   | 99.3 %                                              |                    |
| Absorption correction             | Semi-empirical from equivalents                     |                    |
| Max. and min. transmission        | 0.3667 and 0.1821                                   |                    |
| Refinement method                 | Full-matrix least-squares on F <sup>2</sup>         |                    |
| Data / restraints / parameters    | 2943 / 24 / 192                                     |                    |
| Goodness-of-fit on F <sup>2</sup> | 1.065                                               |                    |
| Final R indices [I > 2σ(I)]       | R1 = 0.0283, wR2 = 0.0732                           |                    |
| R indices (all data)              | R1 = 0.0300, wR2 = 0.0747                           |                    |
| Extinction coefficient            | n/a                                                 |                    |
| Largest diff. peak and hole       | 1.805 and -1.166 e.Å <sup>-3</sup>                  |                    |

**Table S3.** Atomic coordinates ( $\times 10^4$ ) and equivalent isotropic displacement parameters ( $\text{\AA}^2 \times 10^3$ ) for 20190920zh\_znz4046\_2\_0m\_a\_sq. U(eq) is defined as one third of the trace of the orthogonalized  $U^{ij}$  tensor.

|       | x        | y        | z        | U(eq)  |
|-------|----------|----------|----------|--------|
| Bi(1) | 3928(1)  | 5486(1)  | 6041(1)  | 20(1)  |
| C(1)  | 6724(5)  | 5824(4)  | 6858(5)  | 23(1)  |
| C(2)  | 8045(5)  | 6262(4)  | 7262(5)  | 23(1)  |
| C(3)  | 9151(5)  | 5963(4)  | 6797(5)  | 26(1)  |
| C(4)  | 10397(5) | 6383(4)  | 7163(5)  | 23(1)  |
| C(5)  | 10516(5) | 7087(4)  | 7980(5)  | 25(1)  |
| C(6)  | 9415(5)  | 7382(4)  | 8441(5)  | 23(1)  |
| C(7)  | 8187(5)  | 6967(4)  | 8075(5)  | 26(1)  |
| C(8)  | 11581(6) | 6045(4)  | 6678(5)  | 28(1)  |
| C(9)  | 9532(5)  | 8144(4)  | 9332(5)  | 23(1)  |
| C(10) | 6405(18) | 3335(13) | 9837(16) | 161(6) |
| C(11) | 3990(20) | 3466(15) | 9803(18) | 186(8) |
| C(12) | 5022(14) | 4328(8)  | 8411(11) | 89(3)  |
| N(1)  | 5120(11) | 3722(7)  | 9337(9)  | 96(3)  |
| O(1)  | 6636(4)  | 5080(3)  | 6330(4)  | 26(1)  |
| O(2)  | 5684(3)  | 6254(3)  | 7090(4)  | 28(1)  |
| O(3)  | 8570(4)  | 8225(3)  | 9918(4)  | 28(1)  |
| O(4)  | 10522(4) | 8652(2)  | 9456(4)  | 27(1)  |
| O(5)  | 12739(3) | 6342(3)  | 7127(3)  | 26(1)  |
| O(6)  | 11453(5) | 5447(3)  | 5886(5)  | 51(2)  |
| O(7)  | 4147(8)  | 4713(4)  | 7944(5)  | 68(2)  |

**Table S4.** Bond lengths [Å] and angles [°] for 20190920zh\_znz4046\_2\_0m\_a\_sq.

---

|              |           |
|--------------|-----------|
| Bi(1)-O(5)#1 | 2.257(4)  |
| Bi(1)-O(2)   | 2.264(4)  |
| Bi(1)-O(3)#2 | 2.284(4)  |
| Bi(1)-O(7)   | 2.421(5)  |
| Bi(1)-O(6)#1 | 2.485(5)  |
| Bi(1)-C(8)#1 | 2.734(6)  |
| Bi(1)-C(1)   | 2.868(5)  |
| C(1)-O(1)    | 1.247(7)  |
| C(1)-O(2)    | 1.297(7)  |
| C(1)-C(2)    | 1.485(7)  |
| C(2)-C(7)    | 1.382(8)  |
| C(2)-C(3)    | 1.393(8)  |
| C(3)-C(4)    | 1.402(8)  |
| C(3)-H(3)    | 0.9500    |
| C(4)-C(5)    | 1.385(8)  |
| C(4)-C(8)    | 1.493(7)  |
| C(5)-C(6)    | 1.385(8)  |
| C(5)-H(5)    | 0.9500    |
| C(6)-C(7)    | 1.385(8)  |
| C(6)-C(9)    | 1.503(8)  |
| C(7)-H(7)    | 0.9500    |
| C(8)-O(6)    | 1.251(7)  |
| C(8)-O(5)    | 1.273(7)  |
| C(9)-O(4)    | 1.241(6)  |
| C(9)-O(3)    | 1.281(7)  |
| C(10)-N(1)   | 1.444(17) |
| C(10)-H(10A) | 0.9800    |
| C(10)-H(10B) | 0.9800    |
| C(10)-H(10C) | 0.9800    |
| C(11)-N(1)   | 1.397(19) |
| C(11)-H(11A) | 0.9800    |
| C(11)-H(11B) | 0.9800    |
| C(11)-H(11C) | 0.9800    |
| C(12)-O(7)   | 1.107(13) |
| C(12)-N(1)   | 1.371(14) |
| C(12)-H(12)  | 0.9500    |

|                     |            |
|---------------------|------------|
| O(5)#1-Bi(1)-O(2)   | 83.02(13)  |
| O(5)#1-Bi(1)-O(3)#2 | 77.98(14)  |
| O(2)-Bi(1)-O(3)#2   | 84.83(15)  |
| O(5)#1-Bi(1)-O(7)   | 75.48(17)  |
| O(2)-Bi(1)-O(7)     | 80.0(2)    |
| O(3)#2-Bi(1)-O(7)   | 150.75(18) |
| O(5)#1-Bi(1)-O(6)#1 | 54.69(14)  |
| O(2)-Bi(1)-O(6)#1   | 137.70(14) |
| O(3)#2-Bi(1)-O(6)#1 | 85.47(17)  |
| O(7)-Bi(1)-O(6)#1   | 89.1(2)    |
| O(5)#1-Bi(1)-C(8)#1 | 27.49(15)  |
| O(2)-Bi(1)-C(8)#1   | 110.51(15) |
| O(3)#2-Bi(1)-C(8)#1 | 80.60(16)  |
| O(7)-Bi(1)-C(8)#1   | 81.5(2)    |
| O(6)#1-Bi(1)-C(8)#1 | 27.20(16)  |
| O(5)#1-Bi(1)-C(1)   | 108.57(14) |
| O(2)-Bi(1)-C(1)     | 26.04(15)  |
| O(3)#2-Bi(1)-C(1)   | 94.96(15)  |
| O(7)-Bi(1)-C(1)     | 82.1(2)    |
| O(6)#1-Bi(1)-C(1)   | 162.85(16) |
| C(8)#1-Bi(1)-C(1)   | 135.98(16) |
| O(1)-C(1)-O(2)      | 122.4(5)   |
| O(1)-C(1)-C(2)      | 121.0(5)   |
| O(2)-C(1)-C(2)      | 116.5(5)   |
| O(1)-C(1)-Bi(1)     | 73.0(3)    |
| O(2)-C(1)-Bi(1)     | 50.0(3)    |
| C(2)-C(1)-Bi(1)     | 164.2(4)   |
| C(7)-C(2)-C(3)      | 119.8(5)   |
| C(7)-C(2)-C(1)      | 121.0(5)   |
| C(3)-C(2)-C(1)      | 119.2(5)   |
| C(2)-C(3)-C(4)      | 119.4(5)   |
| C(2)-C(3)-H(3)      | 120.3      |
| C(4)-C(3)-H(3)      | 120.3      |
| C(5)-C(4)-C(3)      | 119.9(5)   |
| C(5)-C(4)-C(8)      | 121.1(5)   |
| C(3)-C(4)-C(8)      | 119.0(5)   |
| C(4)-C(5)-C(6)      | 120.6(5)   |

|                     |           |
|---------------------|-----------|
| C(4)-C(5)-H(5)      | 119.7     |
| C(6)-C(5)-H(5)      | 119.7     |
| C(5)-C(6)-C(7)      | 119.3(5)  |
| C(5)-C(6)-C(9)      | 121.1(5)  |
| C(7)-C(6)-C(9)      | 119.5(5)  |
| C(2)-C(7)-C(6)      | 121.1(5)  |
| C(2)-C(7)-H(7)      | 119.5     |
| C(6)-C(7)-H(7)      | 119.5     |
| O(6)-C(8)-O(5)      | 120.2(5)  |
| O(6)-C(8)-C(4)      | 120.9(5)  |
| O(5)-C(8)-C(4)      | 118.9(5)  |
| O(6)-C(8)-Bi(1)#3   | 65.2(3)   |
| O(5)-C(8)-Bi(1)#3   | 54.9(3)   |
| C(4)-C(8)-Bi(1)#3   | 173.3(4)  |
| O(4)-C(9)-O(3)      | 124.0(5)  |
| O(4)-C(9)-C(6)      | 119.7(5)  |
| O(3)-C(9)-C(6)      | 116.3(5)  |
| N(1)-C(10)-H(10A)   | 109.5     |
| N(1)-C(10)-H(10B)   | 109.5     |
| H(10A)-C(10)-H(10B) | 109.5     |
| N(1)-C(10)-H(10C)   | 109.5     |
| H(10A)-C(10)-H(10C) | 109.5     |
| H(10B)-C(10)-H(10C) | 109.5     |
| N(1)-C(11)-H(11A)   | 109.5     |
| N(1)-C(11)-H(11B)   | 109.5     |
| H(11A)-C(11)-H(11B) | 109.5     |
| N(1)-C(11)-H(11C)   | 109.5     |
| H(11A)-C(11)-H(11C) | 109.5     |
| H(11B)-C(11)-H(11C) | 109.5     |
| O(7)-C(12)-N(1)     | 130.3(13) |
| O(7)-C(12)-H(12)    | 114.8     |
| N(1)-C(12)-H(12)    | 114.8     |
| C(12)-N(1)-C(11)    | 120.9(14) |
| C(12)-N(1)-C(10)    | 119.9(13) |
| C(11)-N(1)-C(10)    | 119.2(14) |
| C(1)-O(2)-Bi(1)     | 104.0(3)  |
| C(9)-O(3)-Bi(1)#4   | 107.9(3)  |
| C(8)-O(5)-Bi(1)#3   | 97.6(3)   |



C(8)-O(6)-Bi(1)#3            87.6(3)

C(12)-O(7)-Bi(1)            127.6(8)

---

Symmetry transformations used to generate equivalent atoms:

#1  $x-1,y,z$     #2  $x-1/2,-y+3/2,z-1/2$     #3  $x+1,y,z$

#4  $x+1/2,-y+3/2,z+1/2$

**Table S5.** Anisotropic displacement parameters ( $\text{\AA}^2 \times 10^3$ ) for 20190920zh\_znz4046\_2\_0m\_a\_sq. The anisotropic displacement factor exponent takes the form:  $-2\pi^2 [ h^2 a^{*2} U^{11} + \dots + 2 h k a^* b^* U^{12} ]$

|       | U <sup>11</sup> | U <sup>22</sup> | U <sup>33</sup> | U <sup>23</sup> | U <sup>13</sup> | U <sup>12</sup> |
|-------|-----------------|-----------------|-----------------|-----------------|-----------------|-----------------|
| Bi(1) | 15(1)           | 22(1)           | 24(1)           | -1(1)           | 6(1)            | 1(1)            |
| C(1)  | 18(3)           | 30(3)           | 23(3)           | -2(2)           | 6(2)            | -1(2)           |
| C(2)  | 12(3)           | 27(3)           | 29(3)           | -1(2)           | 5(2)            | 0(2)            |
| C(3)  | 16(3)           | 28(3)           | 36(3)           | -6(2)           | 9(2)            | -2(2)           |
| C(4)  | 12(3)           | 30(3)           | 29(3)           | -4(2)           | 8(2)            | 0(2)            |
| C(5)  | 18(3)           | 27(3)           | 28(3)           | -4(2)           | 3(2)            | -3(2)           |
| C(6)  | 17(3)           | 22(3)           | 30(3)           | -4(2)           | 6(2)            | 1(2)            |
| C(7)  | 19(3)           | 30(3)           | 30(3)           | -2(2)           | 11(2)           | 3(2)            |
| C(8)  | 20(3)           | 35(3)           | 30(3)           | -5(3)           | 9(2)            | -1(2)           |
| C(9)  | 19(3)           | 22(3)           | 27(3)           | 1(2)            | 4(2)            | 2(2)            |
| C(10) | 159(10)         | 165(10)         | 139(9)          | 5(8)            | -27(8)          | 35(8)           |
| C(11) | 194(11)         | 199(12)         | 178(11)         | 5(9)            | 71(9)           | -28(9)          |
| C(12) | 102(5)          | 85(5)           | 79(5)           | 1(4)            | 12(4)           | -2(4)           |
| N(1)  | 115(5)          | 87(4)           | 84(4)           | 6(4)            | 15(4)           | 1(4)            |
| O(1)  | 19(2)           | 28(2)           | 31(2)           | -4(2)           | 6(2)            | -2(2)           |
| O(2)  | 11(2)           | 38(2)           | 36(2)           | -14(2)          | 3(2)            | -2(2)           |
| O(3)  | 26(2)           | 27(2)           | 34(2)           | -6(2)           | 11(2)           | -2(2)           |
| O(4)  | 17(2)           | 22(2)           | 42(2)           | -7(2)           | 6(2)            | -6(2)           |
| O(5)  | 12(2)           | 39(2)           | 28(2)           | -8(2)           | 7(2)            | -2(2)           |
| O(6)  | 21(2)           | 73(4)           | 61(3)           | -40(3)          | 14(2)           | -7(2)           |
| O(7)  | 109(5)          | 61(4)           | 40(3)           | 26(3)           | 24(3)           | 33(4)           |

**Table S6.** Hydrogen coordinates ( $\times 10^4$ ) and isotropic displacement parameters ( $\text{\AA}^2 \times 10^{-3}$ ) for 20190920zh\_znz4046\_2\_0m\_a\_sq.

|        | x     | y    | z     | U(eq) |
|--------|-------|------|-------|-------|
| H(3)   | 9062  | 5480 | 6236  | 31    |
| H(5)   | 11361 | 7370 | 8226  | 30    |
| H(7)   | 7429  | 7171 | 8387  | 31    |
| H(10A) | 7114  | 3656 | 9521  | 241   |
| H(10B) | 6417  | 2693 | 9619  | 241   |
| H(10C) | 6558  | 3393 | 10710 | 241   |
| H(11A) | 3660  | 3986 | 10203 | 278   |
| H(11B) | 4226  | 2974 | 10380 | 278   |
| H(11C) | 3288  | 3258 | 9152  | 278   |
| H(12)  | 5833  | 4434 | 8125  | 107   |

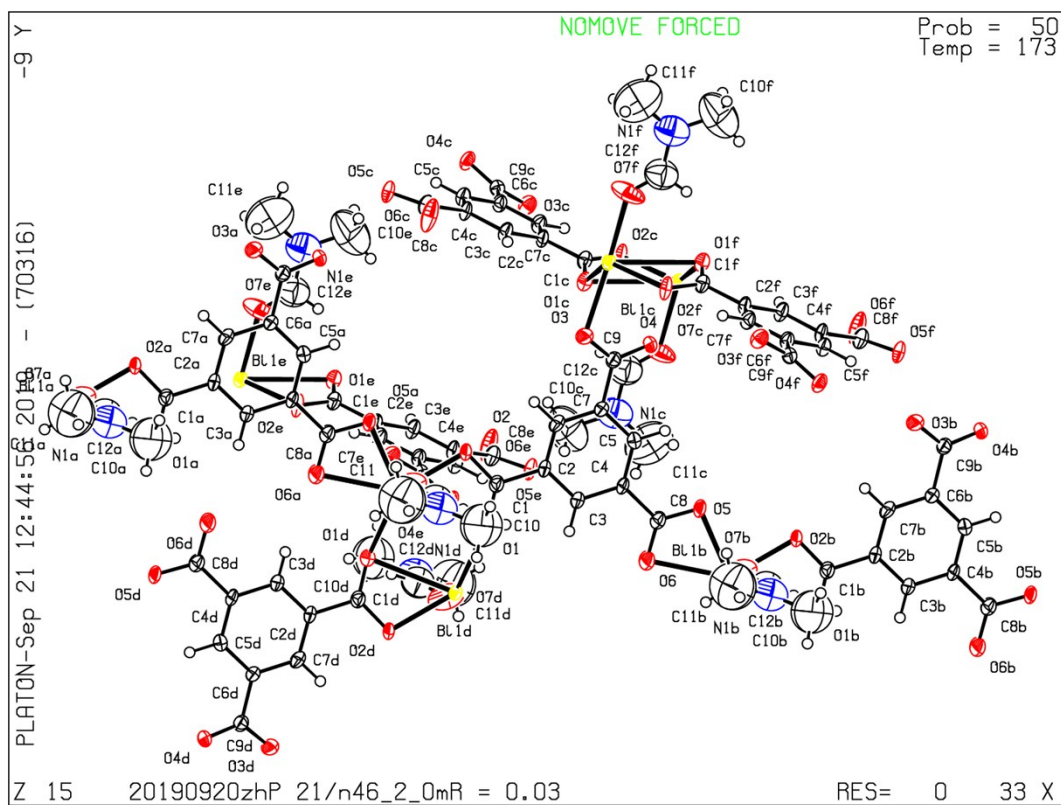

**Figure S1** the Bi-BTC-D crystal structure

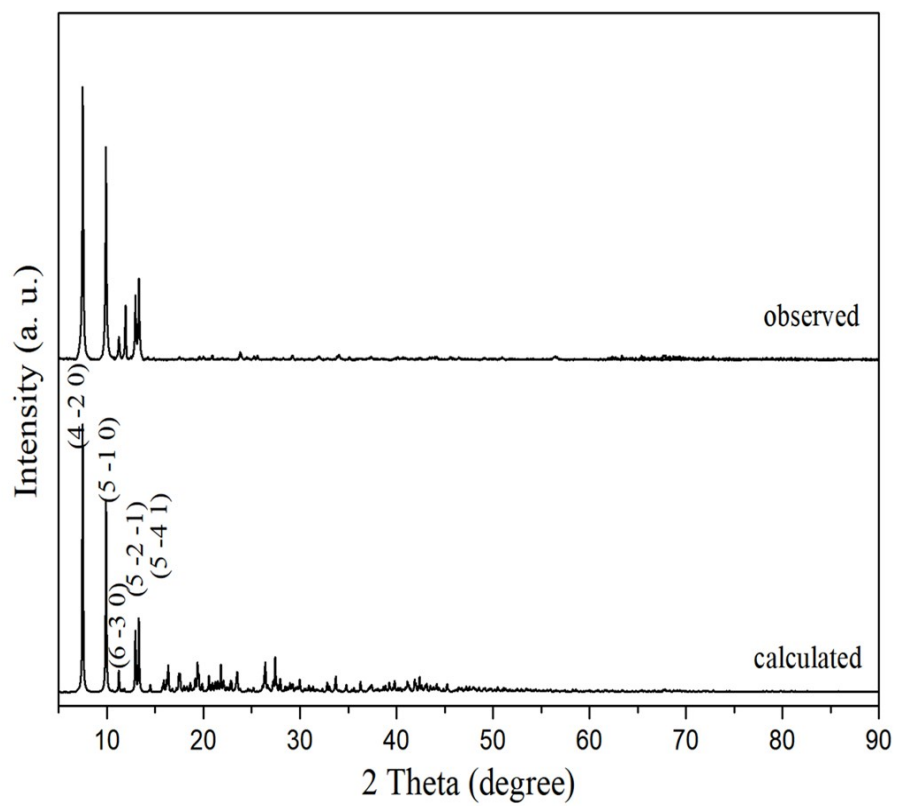

**Figure S2** Observed and calculated X-ray powder diffraction of Bi-BTC.

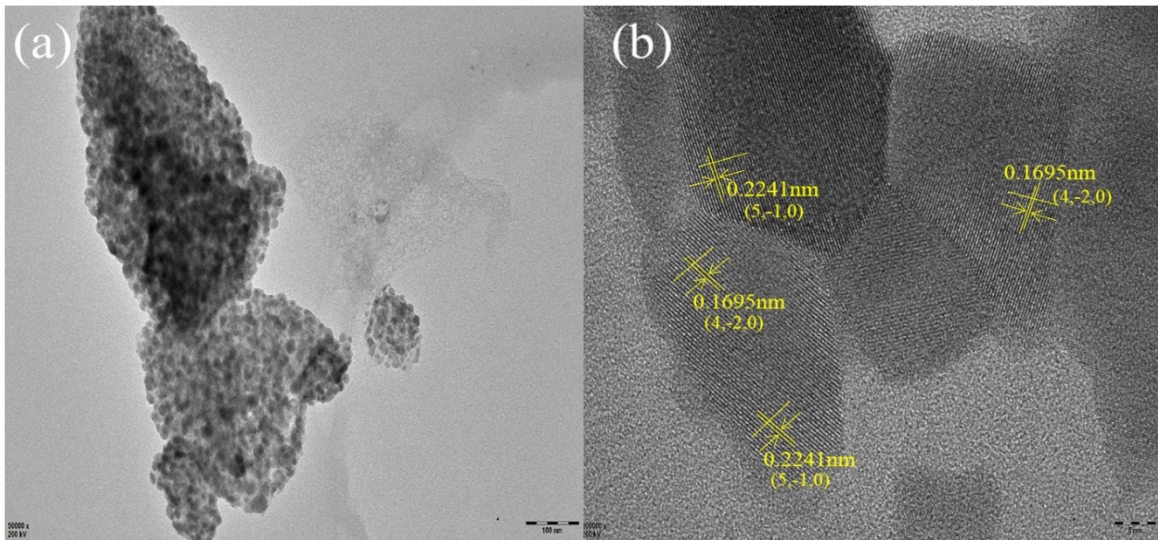

**Figure S3** (a) TEM and (b) HR-TEM image of Bi-BTC composite.

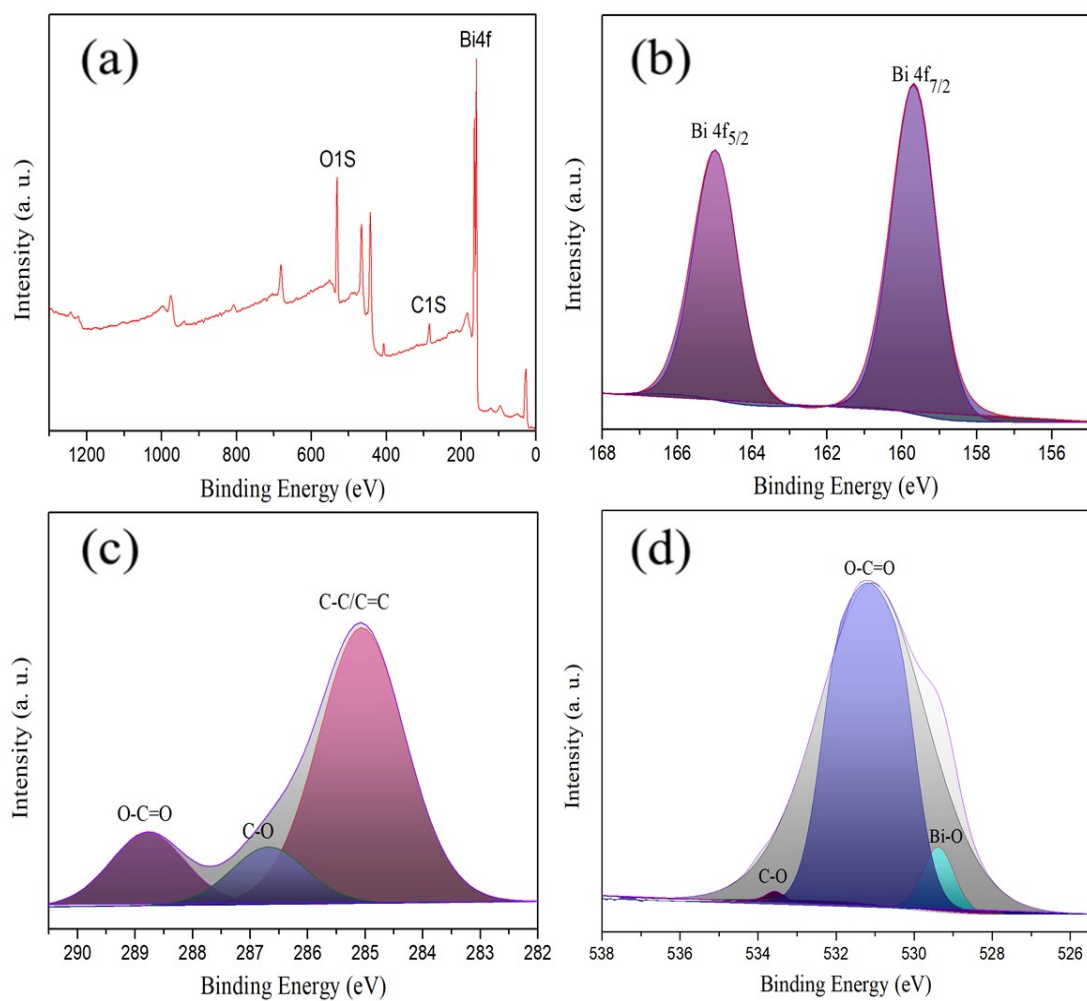

**Figure S4** XPS spectra of Bi-BTC samples: (a) survey scan, (b) Bi 4f, (c) C 1s, (d) O 1s.

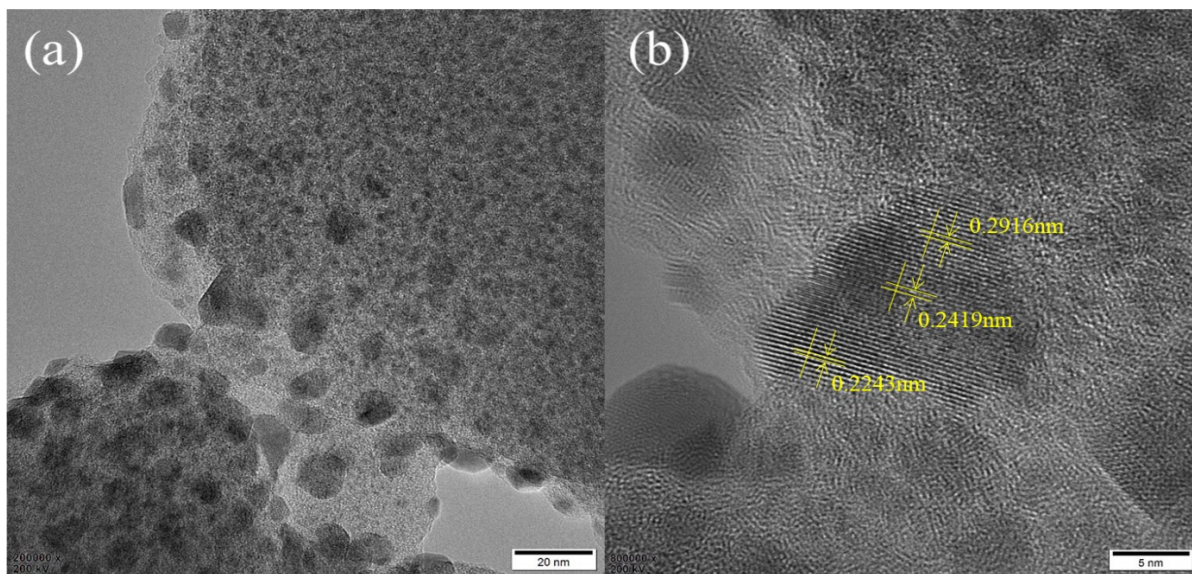

**Figure S5** (a) TEM and (b) HR-TEM image of Bi-BTC composite after CO<sub>2</sub> reduction.



## Reference

1. J. Albo, D. Vallejo, G. Beobide, O. Castillo, P. Castano and A. Irabien, *ChemSusChem*, 2017, **10**, 1100-1109.
2. D. H. Nam, O. S. Bushuyev, J. Li, P. De Luna, A. Seifitokaldani, C. T. Dinh, F. P. Garcia de Arquer, Y. Wang, Z. Liang, A. H. Proppe, C. S. Tan, P. Todorovic, O. Shekhah, C. M. Gabardo, J. W. Jo, J. Choi, M. J. Choi, S. W. Baek, J. Kim, D. Sinton, S. O. Kelley, M. Eddaoudi and E. H. Sargent, *J Am Chem Soc*, 2018, **140**, 11378-11386.
3. Y. L. Qiu, H. X. Zhong, T. T. Zhang, W. B. Xu, P. P. Su, X. F. Li and H. M. Zhang, *Acs Appl Mater Inter*, 2018, **10**, 2480-2489.
4. R. S. Kumar, S. S. Kumar and M. A. Kulandainathan, *Electrochem Commun*, 2012, **25**, 70-73.
5. J. X. Wu, S. Z. Hou, X. D. Zhang, M. Xu, H. F. Yang, P. S. Cao and Z. Y. Gu, *Chem Sci*, 2019, **10**, 2199-2205.
6. J. Albo, M. Perfecto-Irigaray, G. Beobide and A. Irabien, *Journal of Co2 Utilization*, 2019, **33**, 157-165.
7. R. Hinogami, S. Yotsuhashi, M. Deguchi, Y. Zenitani, H. Hashiba and Y. Yamada, *Ecs Electrochem Lett*, 2012, **1**, H17-H19.
8. K. Zhao, Y. Liu, X. Quan, S. Chen and H. Yu, *Acs Appl Mater Inter*, 2017, **9**, 5302-5311.
9. F. Yang, A. Chen, P. L. Deng, Y. Zhou, Z. Shahid, H. Liu and B. Y. Xia, *Chem Sci*, 2019, **10**, 7975-7981.
10. H. H. Wu, M. Zeng, X. Zhu, C. C. Tian, B. B. Mei, Y. Song, X. L. Du, Z. Jiang, L. He, C. G. Xia and S. Dai, *Chemelectrochem*, 2018, **5**, 2717-2721.
11. Y. Wang, P. Hou, Z. Wang and P. Kang, *Chemphyschem*, 2017, **18**, 3142-3147.
12. X. L. Jiang, H. B. Li, J. P. Xiao, D. F. Gao, R. Si, F. Yang, Y. S. Li, G. X. Wang and X. H. Bao, *Nano Energy*, 2018, **52**, 345-350.
13. X. Kang, Q. Zhu, X. Sun, J. Hu, J. Zhang, Z. Liu and B. Han, *Chem Sci*, 2016, **7**, 266-273.
14. I. Hod, M. D. Sampson, P. Deria, C. P. Kubiak, O. K. Farha and J. T. Hupp, *Acs Catalysis*, 2015, **5**, 6302-6309.
15. L. Ye, J. X. Liu, Y. Gao, C. H. Gong, M. Addicoat, T. Heine, C. Woll and L. C. Sun, *Journal of Materials Chemistry A*, 2016, **4**, 15320-15326.
16. B. X. Dong, S. L. Qian, F. Y. Bu, Y. C. Wu, L. G. Feng, Y. L. Teng, W. L. Liu and Z. W. Li, *Acs Applied Energy Materials*, 2018, **1**, 4662-4669.
